# Supplementary material for: Simultaneous formation of non-oxidovanadium(iv) and oxidovanadium(v) complexes incorporating phenol-based hydrazone ligands in aerobic conditions
Source: Royal Society of Chemistry journal article supplement (doi:10.1039/c9nj06114b), 2020-01-01
Supplement: c9nj06114b1.pdf [file c9nj06114b1.pdf]

**NJ-ART-07-2019-003875 (Revised)**

**Simultaneous formation of non-oxidovanadium(IV) and oxidovanadium(V) complexes incorporating phenol-based hydrazone ligands in aerobic condition**

Nirmalendu Biswas, Sachinath Bera, Nayim Sepay, Amrita Pal, Tanmoy Halder, Sudipta Ray, Swarnali Acharyya, Anup Kumar Biswas, Michael G. B. Drew and Tapas Ghosh\*

**Electronic Supplementary Information**

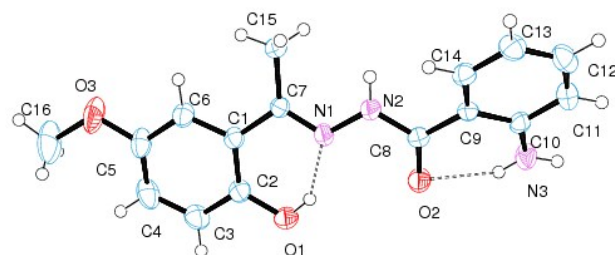

**Fig. S1.** Molecular structure of  $H_2L^3$  with ellipsoids at 30% probability. Hydrogen bonds are shown as dotted bonds.

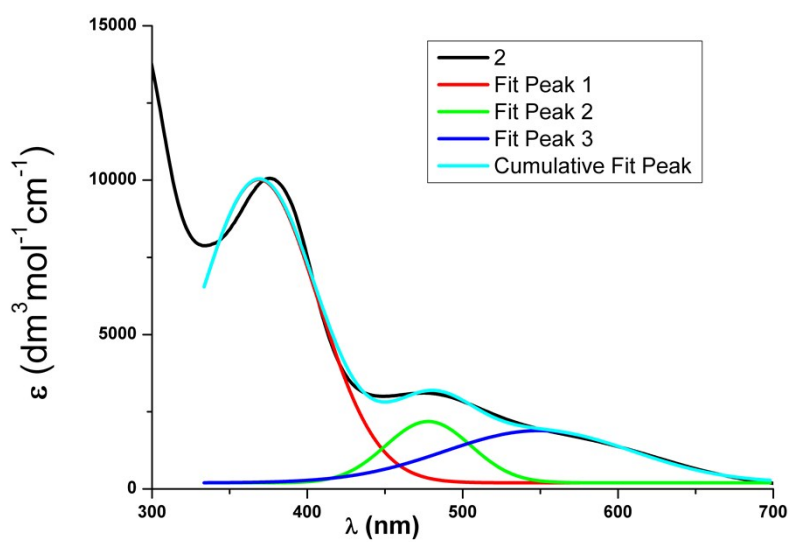

**Fig. S2.** Electronic spectra of **2** in  $CH_2Cl_2$ . (black experimental; red, green, blue and sky deconvoluted).

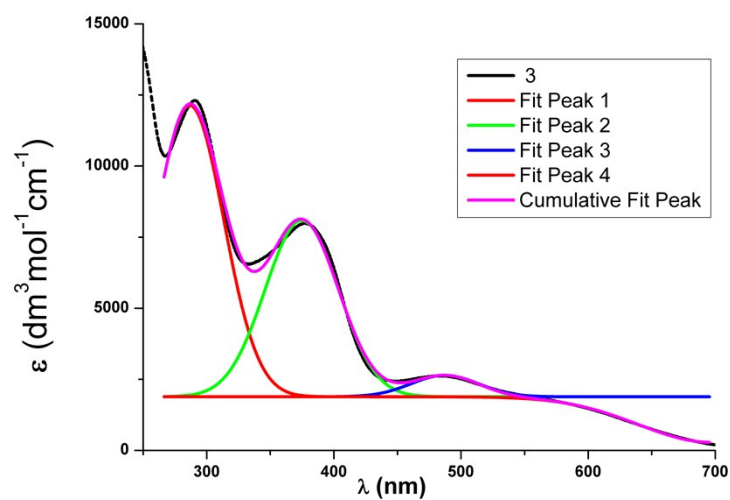

**Fig. S3.** Electronic spectra of **3** in  $\text{CH}_2\text{Cl}_2$ . (black experimental; red, green, blue and sky deconvoluted).

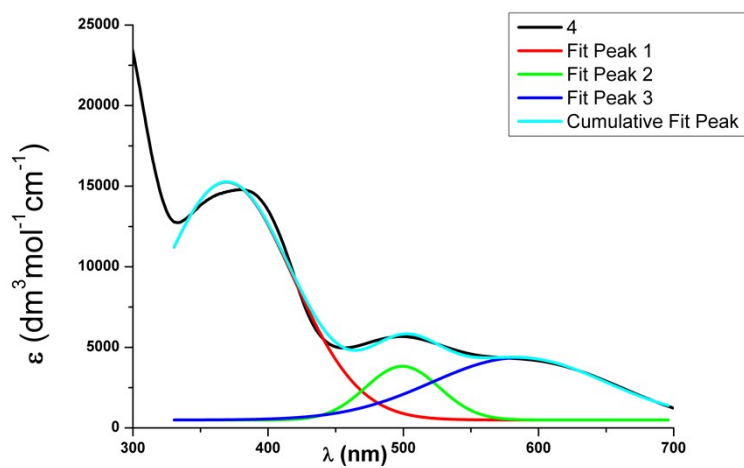

**Fig. S4.** Electronic spectra of **4** in  $\text{CH}_2\text{Cl}_2$ . (black experimental; red, green, blue and sky deconvoluted).

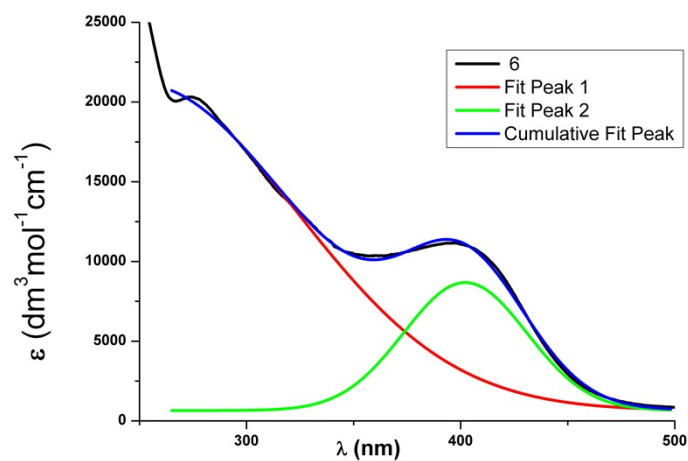

**Fig. S5.** Electronic spectra of **6** in  $\text{CH}_2\text{Cl}_2$ . (black experimental; red, green and blue deconvoluted).

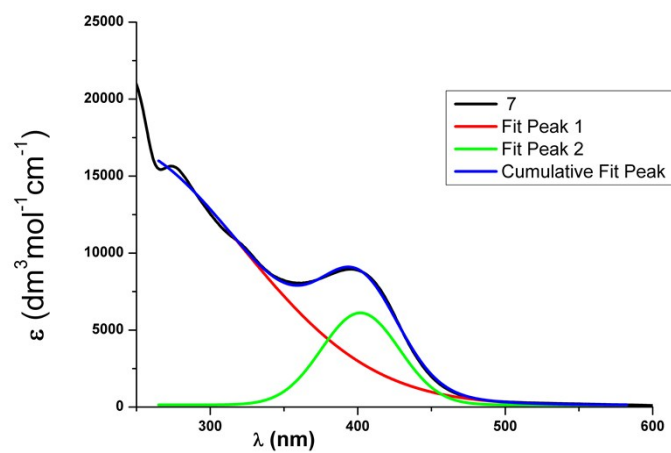

**Fig. S6.** Electronic spectra of **7** in  $\text{CH}_2\text{Cl}_2$ . (black experimental; red, green and blue deconvoluted).

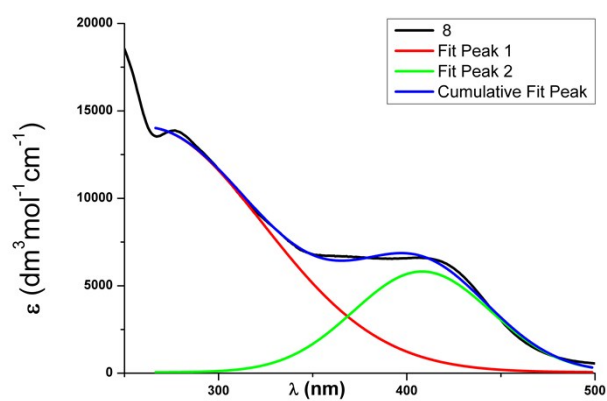

**Fig. S7.** Electronic spectra of **8** in  $\text{CH}_2\text{Cl}_2$ . (black experimental; red, green and blue deconvoluted).

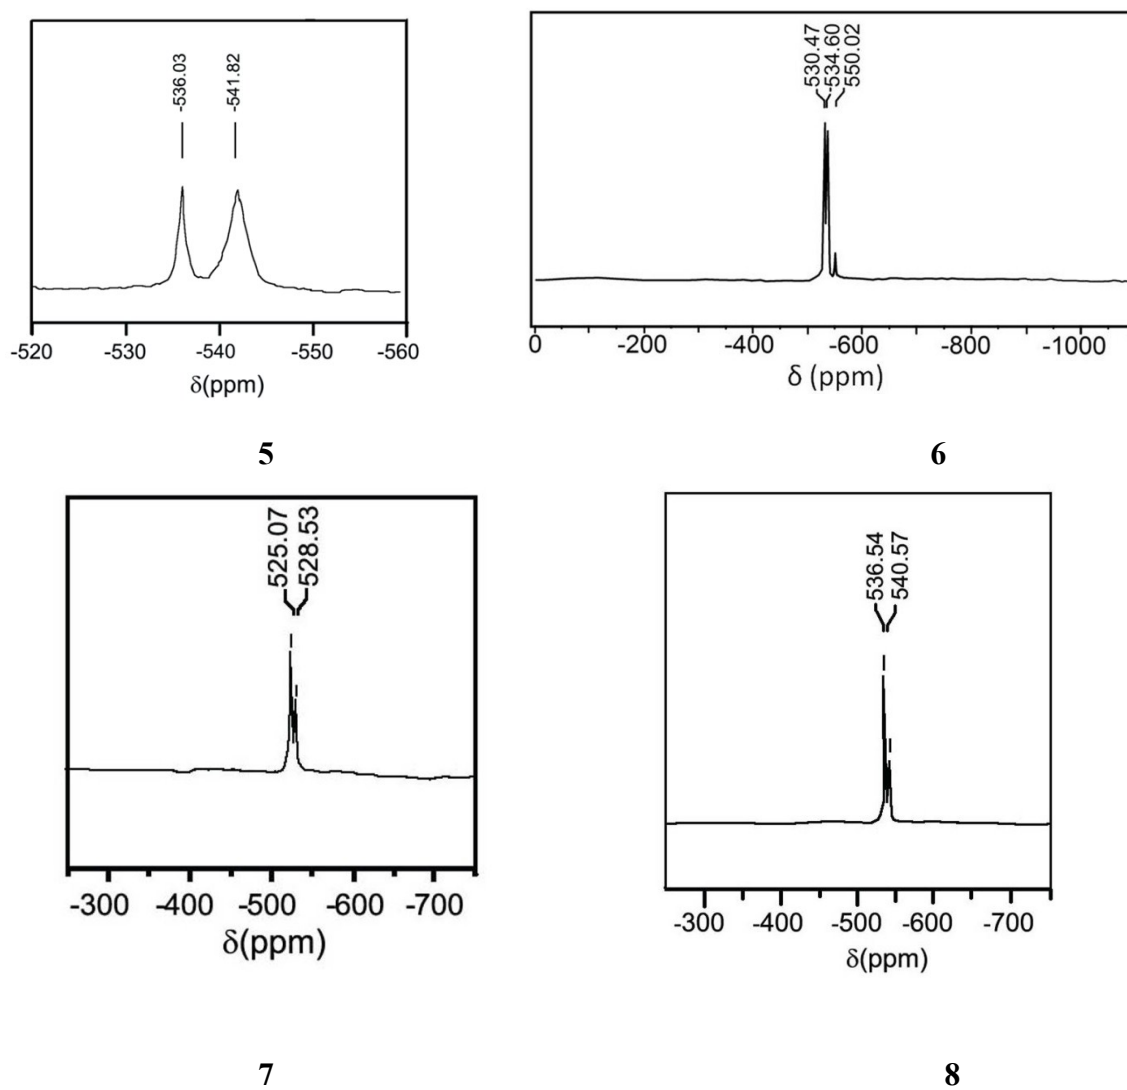

**Fig. S8.**  $^{51}\text{V}$  NMR spectra of **5-8** complexes in  $\text{CDCl}_3$  solution at 298 K.

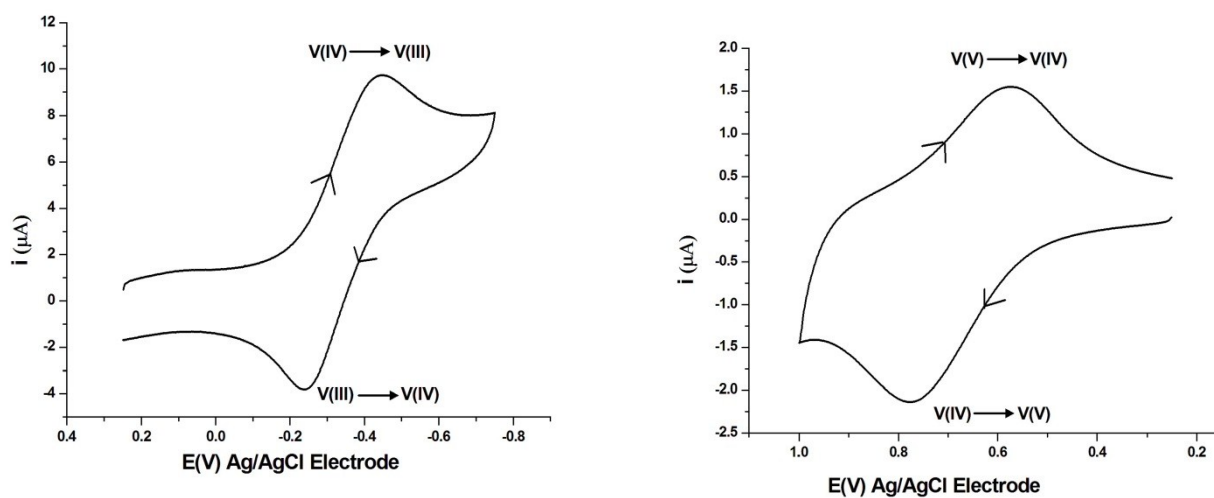

**Fig. S9.** Cyclic voltammogram of **1** in  $\text{CH}_2\text{Cl}_2$ .

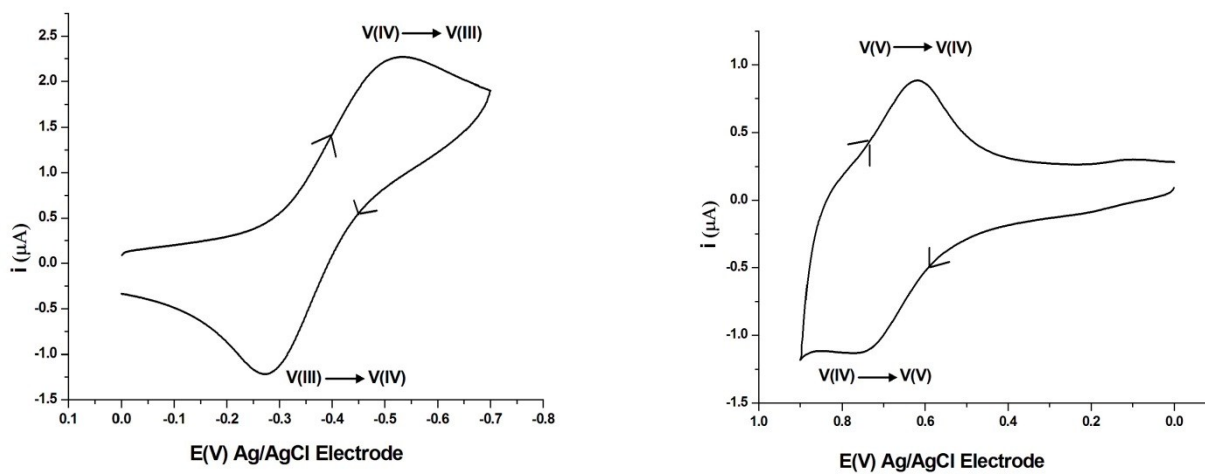

**Fig. S10.** Cyclic voltammogram of **3** in  $\text{CH}_2\text{Cl}_2$ .

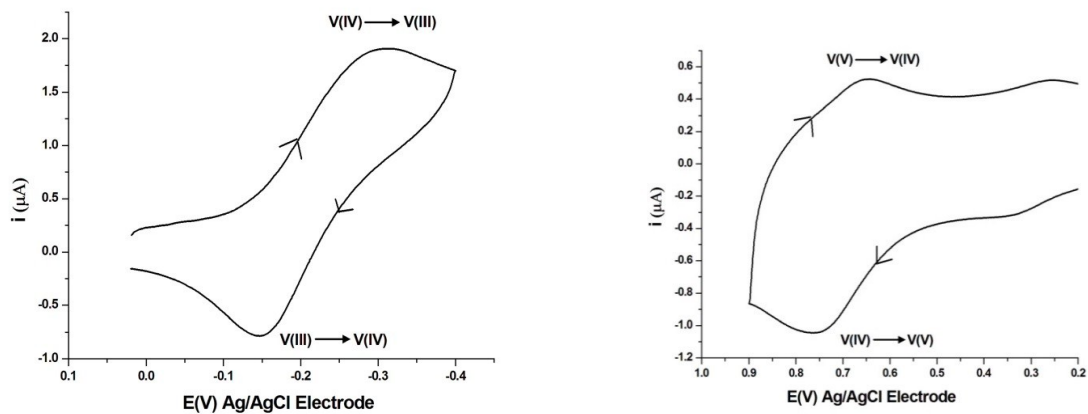

**Fig. S11.** Cyclic voltammogram of **4** in CH<sub>2</sub>Cl<sub>2</sub>.

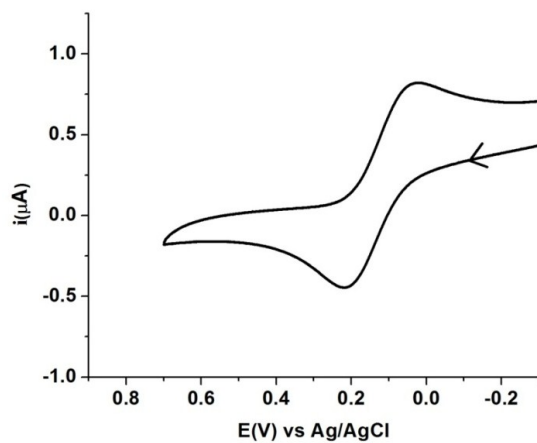

**Fig. S12.** Cyclic voltammogram of **6** in CH<sub>2</sub>Cl<sub>2</sub>.

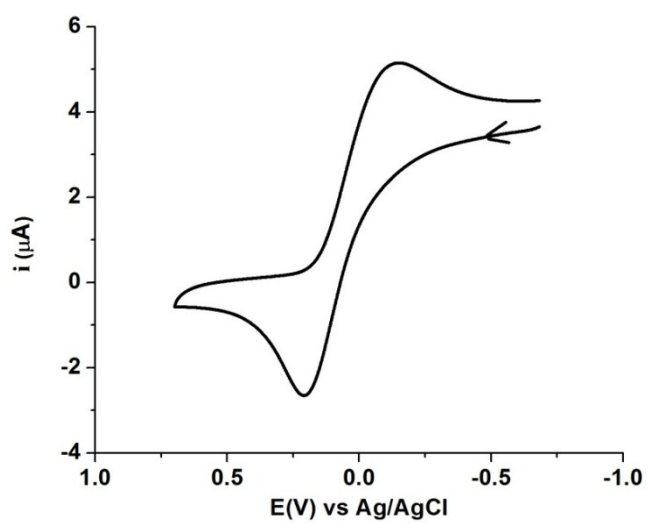

**Fig. S13.** Cyclic voltammogram of **7** in CH<sub>2</sub>Cl<sub>2</sub>.

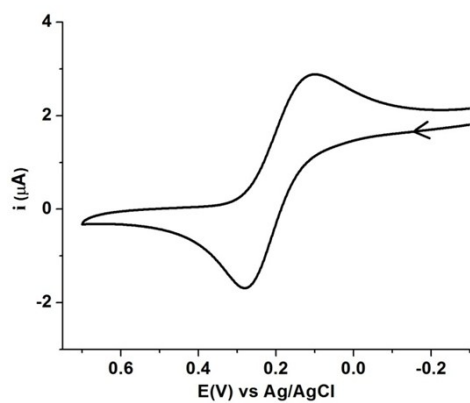

**Fig. S14.** Cyclic voltammogram of **8** in  $\text{CH}_2\text{Cl}_2$ .

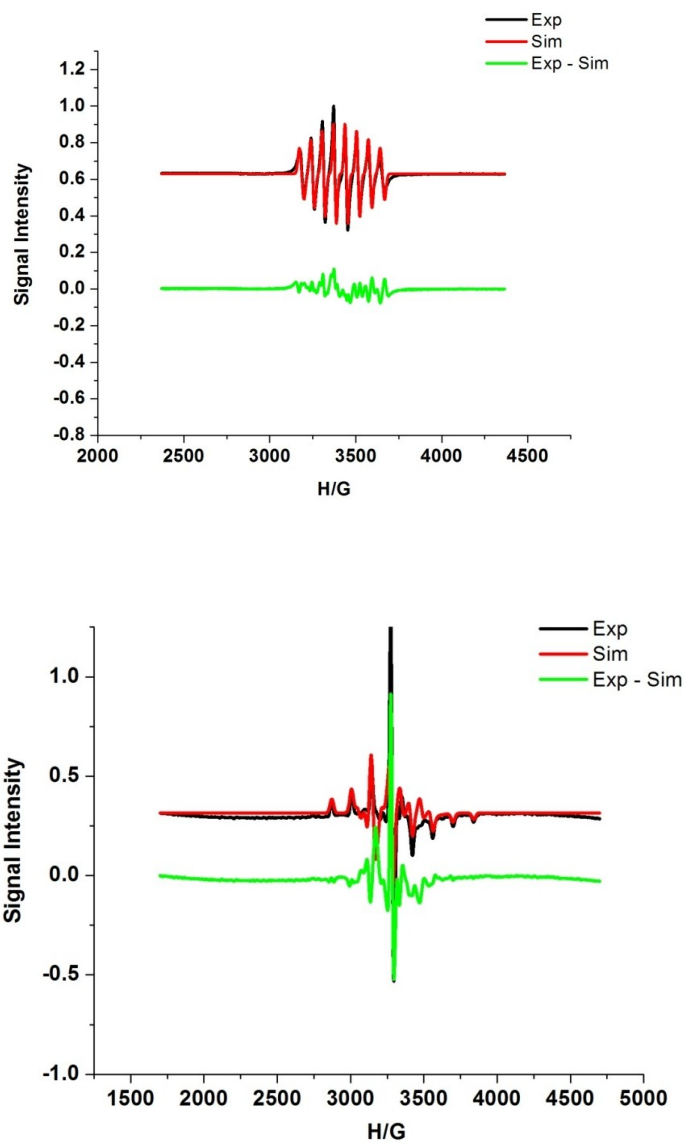

**Fig. S15.** X-band EPR spectra of complex **2** in  $\text{CH}_2\text{Cl}_2$  solution at 300 K (top) and at 77 K (bottom).



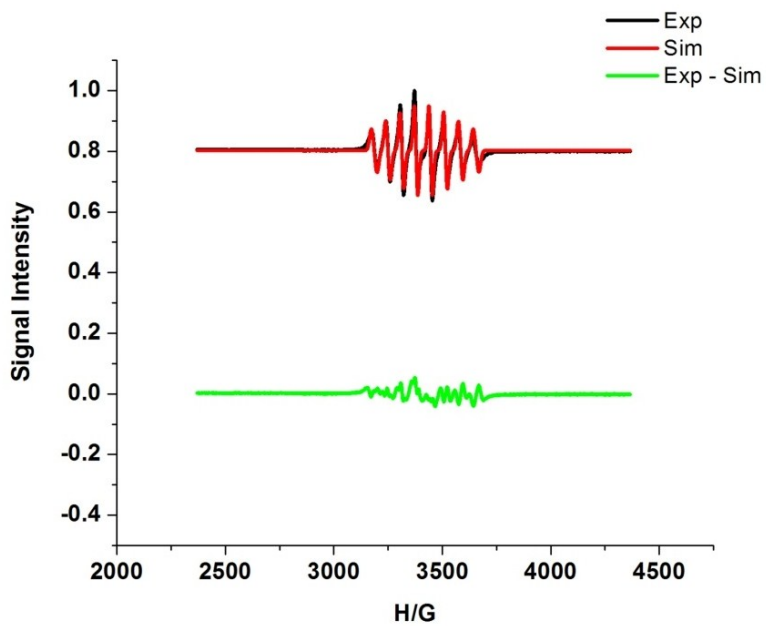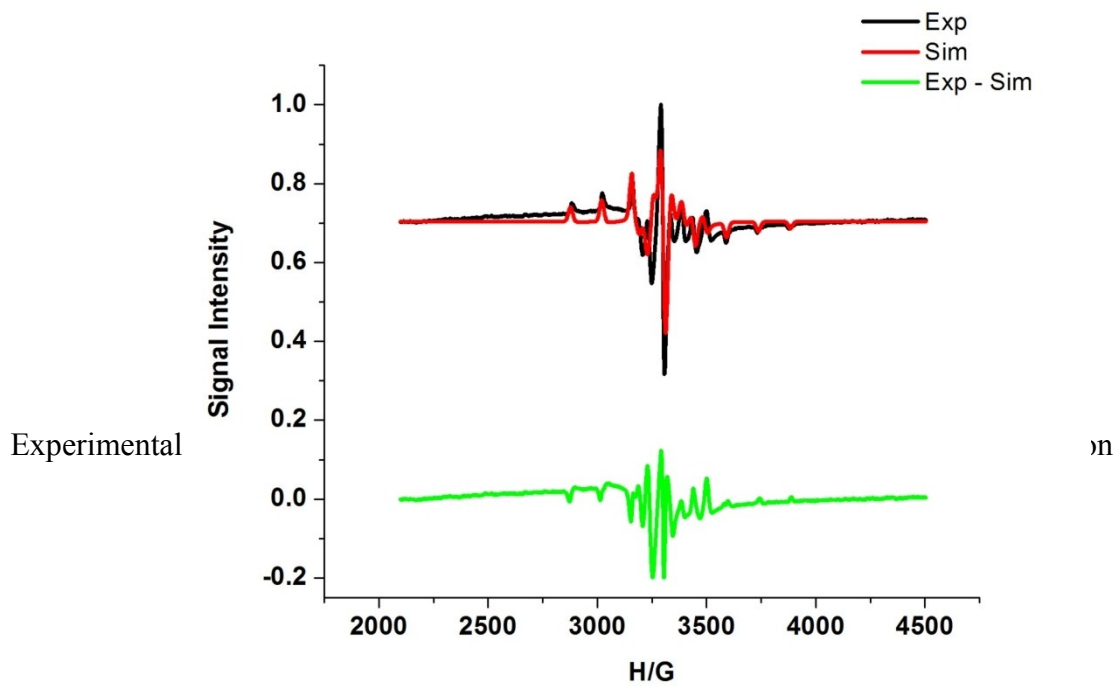

**Fig. S16.** X-band EPR spectra of complex **3** in  $\text{CH}_2\text{Cl}_2$  solution at 300 K (top) and at 77 K (bottom).

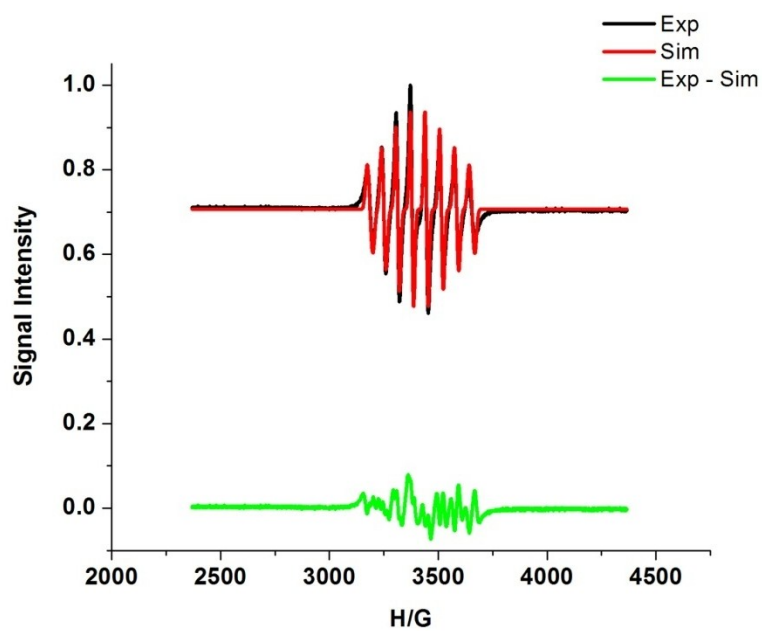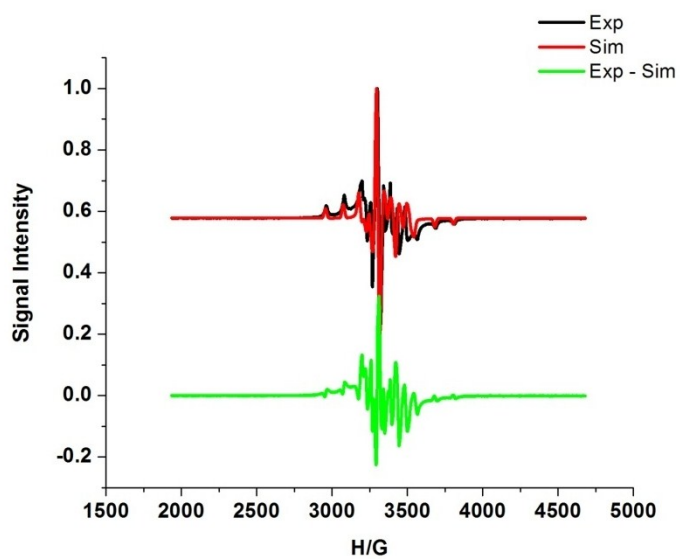

**Fig. S17.** X-band EPR spectra of complex 4 in  $\text{CH}_2\text{Cl}_2$  solution at 300 K (top) and at 77 K (bottom).

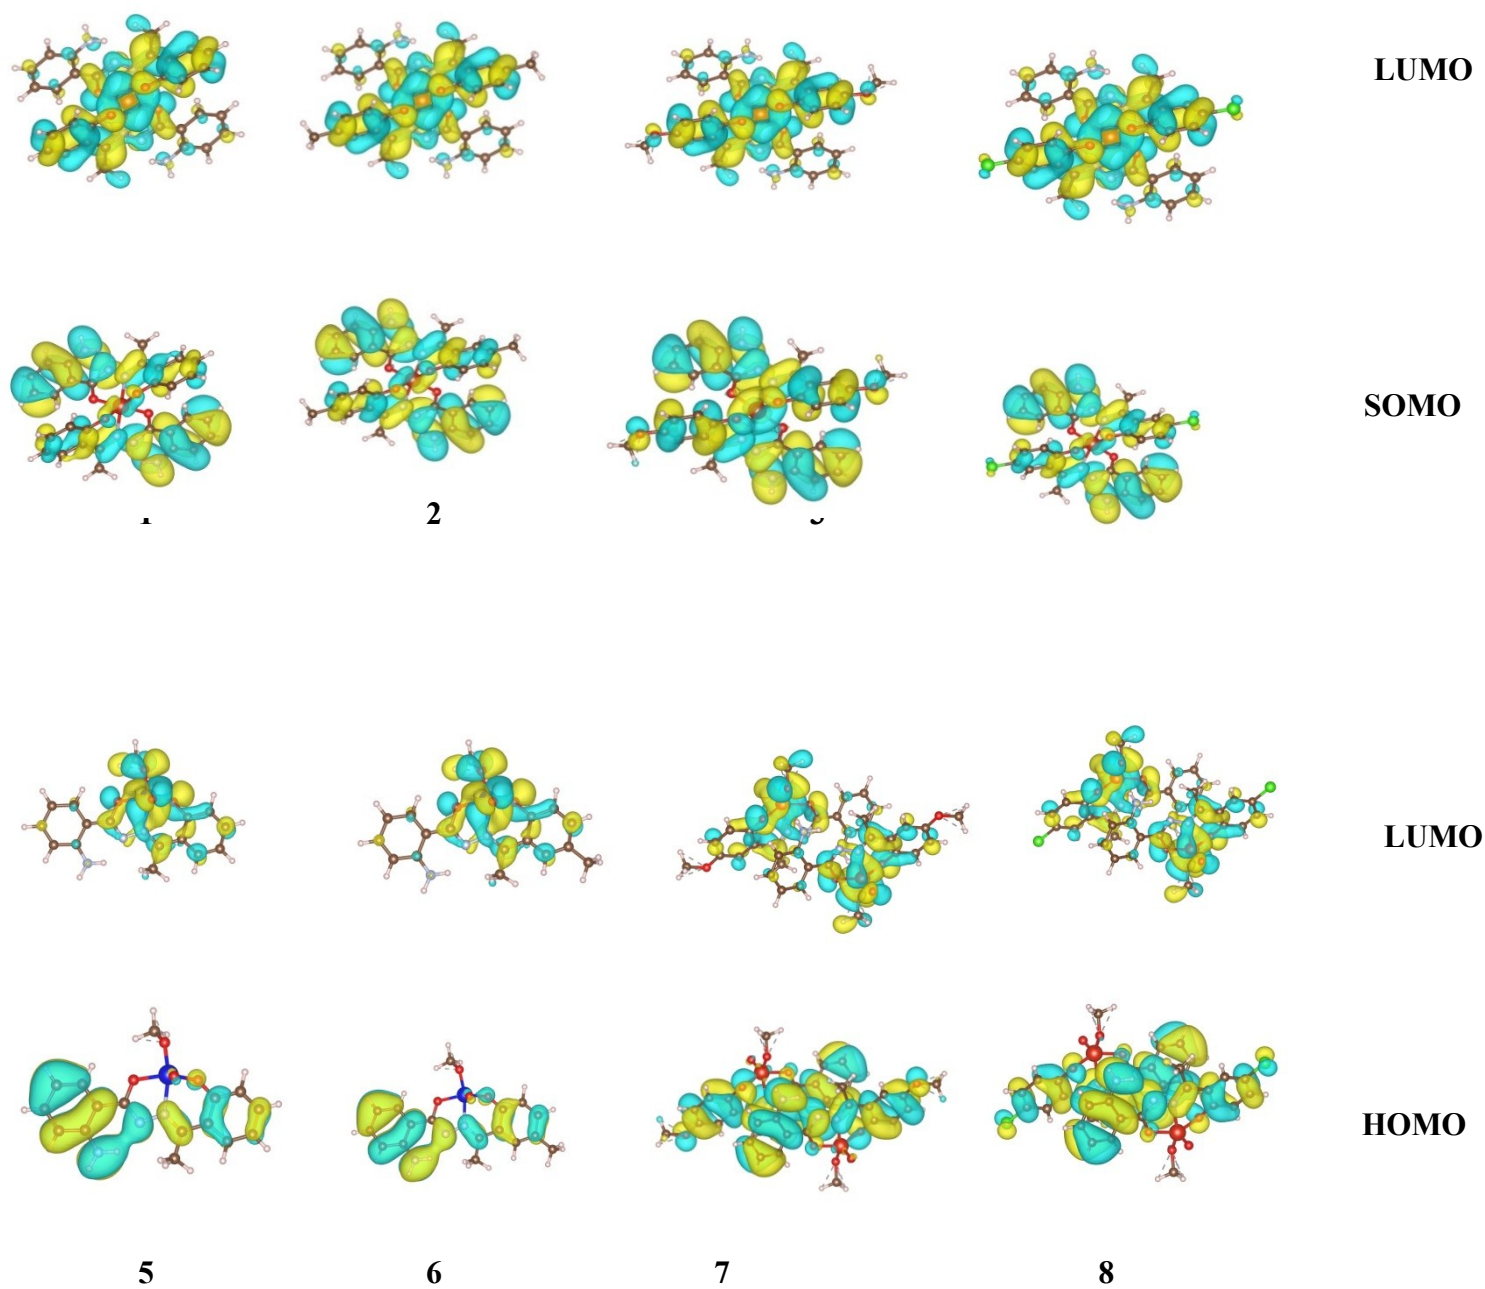

**Fig. S18.** Schematic diagram of selected frontier orbitals of complexes **1-8** in their ground state geometries.

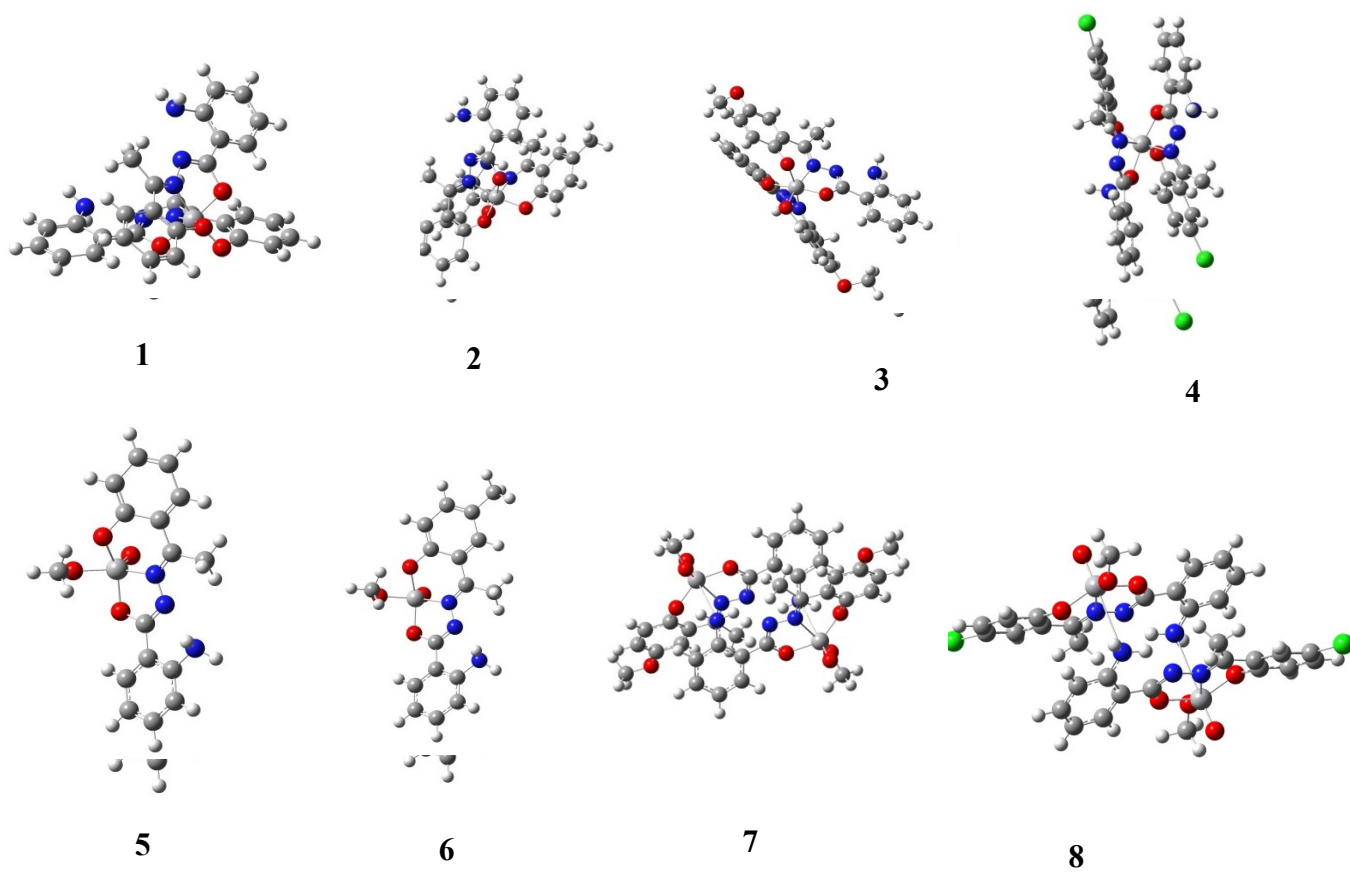

**Fig. S19.** DFT optimized structure of complexes 1-8.

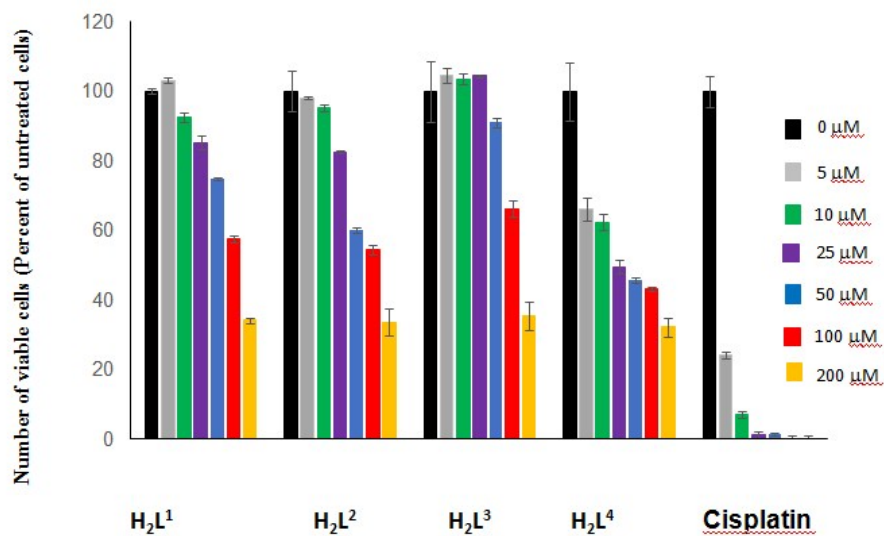

**Fig. S20.** Cytotoxic activity of the H<sub>2</sub>L<sup>1-4</sup> ligands.

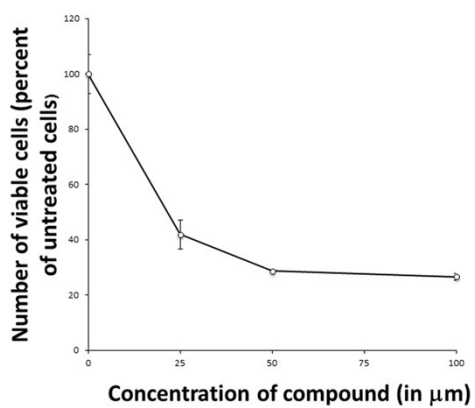

**Fig. S21.** Cytotoxic activity of [V<sup>IV</sup>O(aa)<sub>2</sub>].

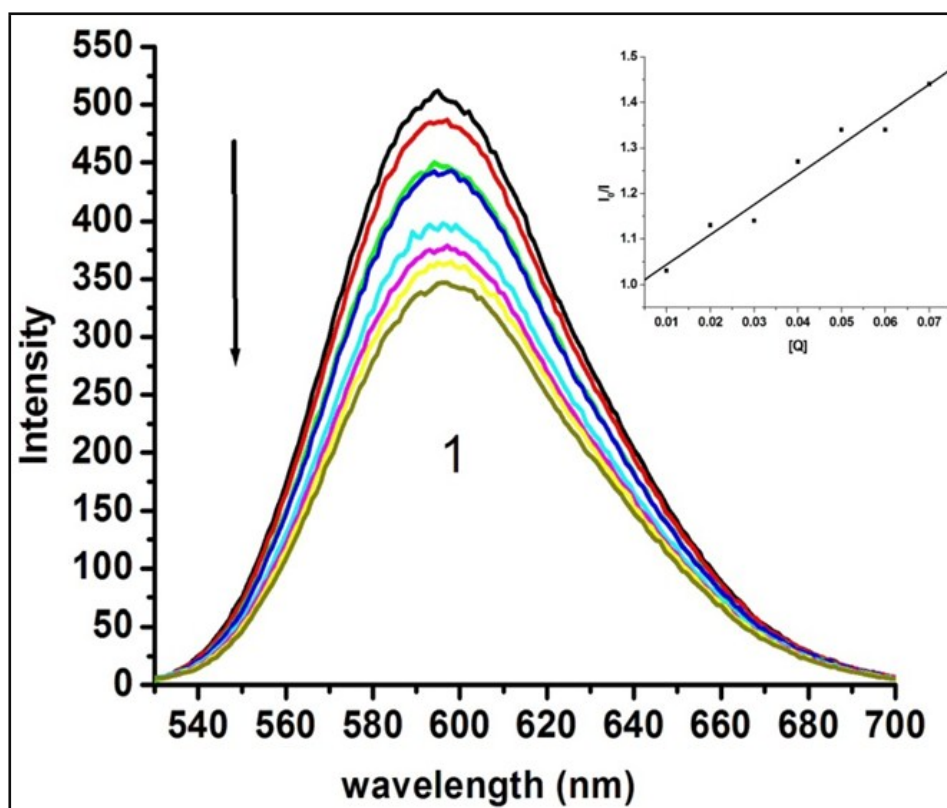

**Fig. S22.** Fluorescence spectra of EB +  $10^{-4}$  M DNA control +  $(1-10) \times 10^{-5}$  M complex **1**. The arrow shows that the intensity decreases with increasing concentration of complex **1**. (Inset: Stern-Volmer plot for the quenching of fluorescence of the ethidium bromide (EB) - DNA complex caused by complex **1**).

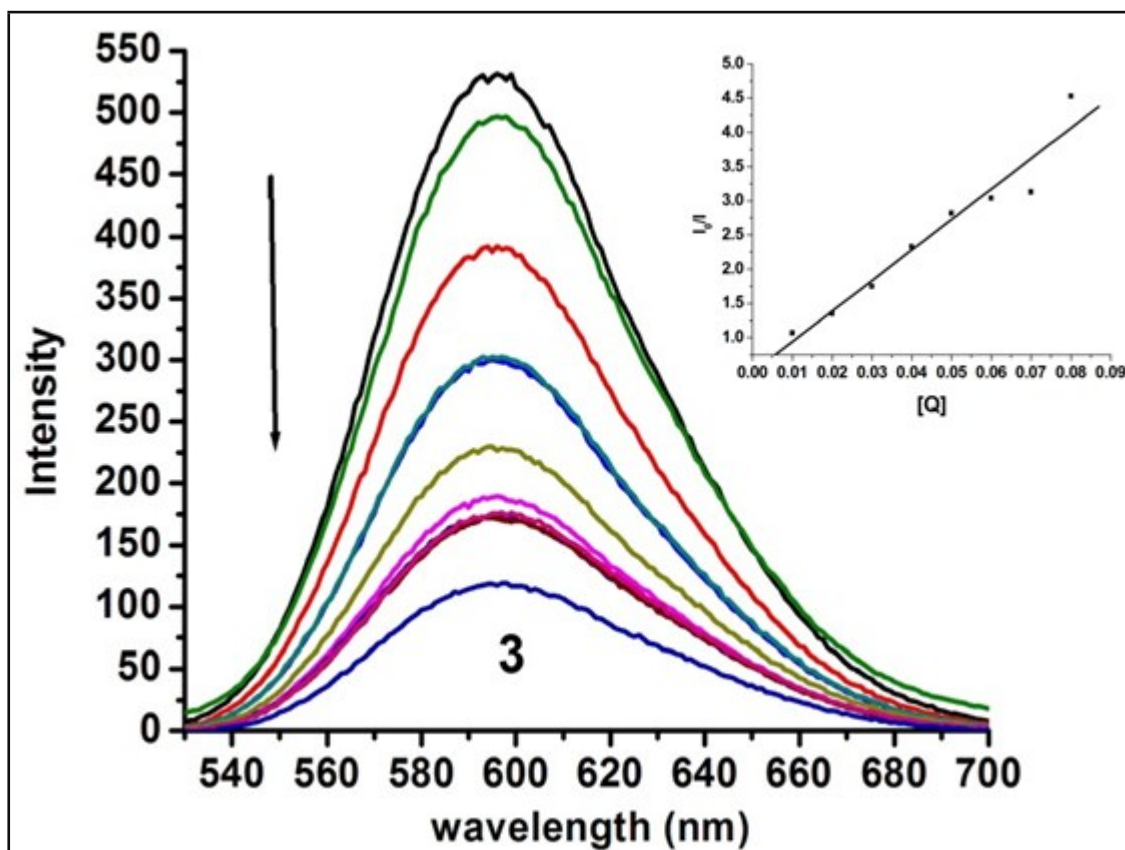

**Fig. S23.** Fluorescence spectra of EB +  $10^{-4}$  M DNA control +  $(1-10) \times 10^{-5}$  M complex **3**. The arrow shows that the intensity decreases with increasing concentration of complex 1. (Inset: Stern-Volmer plot for the quenching of fluorescence of the ethidium bromide (EB) - DNA complex caused by complex **3**).

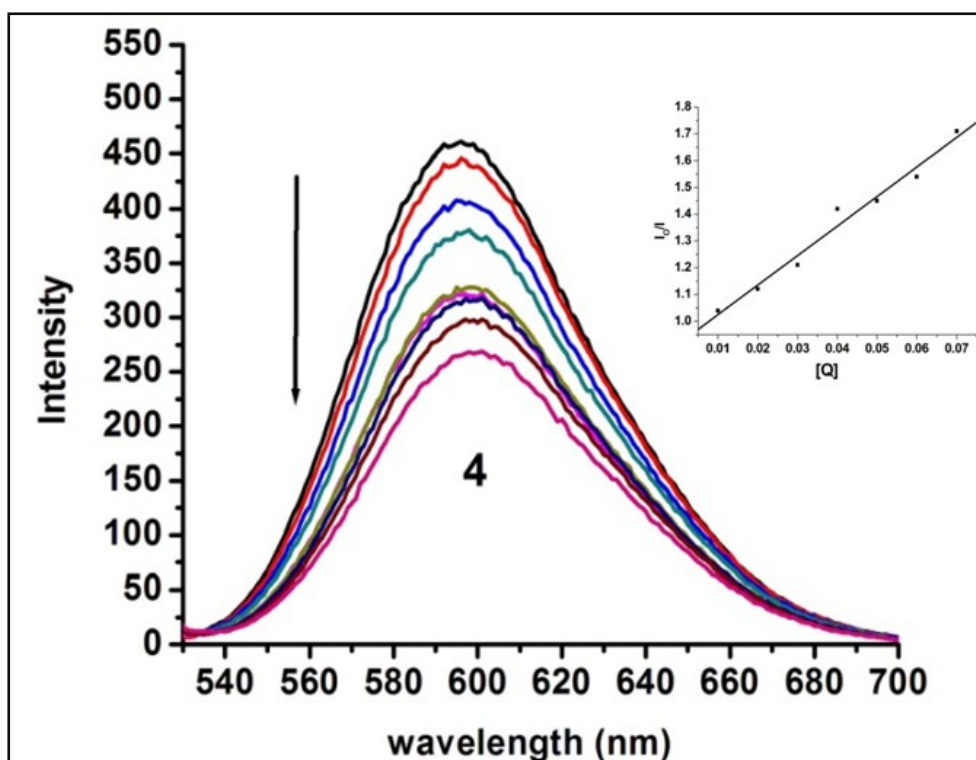

**Fig. S24.** Fluorescence spectra of EB +  $10^{-4}$  M DNA control +  $(1-10) \times 10^{-5}$  M complex **4**. The arrow shows that the intensity decreases with increasing concentration of complex **4**. (Inset: Stern-Volmer plot for the quenching of fluorescence of the ethidium bromide (EB) - DNA complex caused by complex **4**).



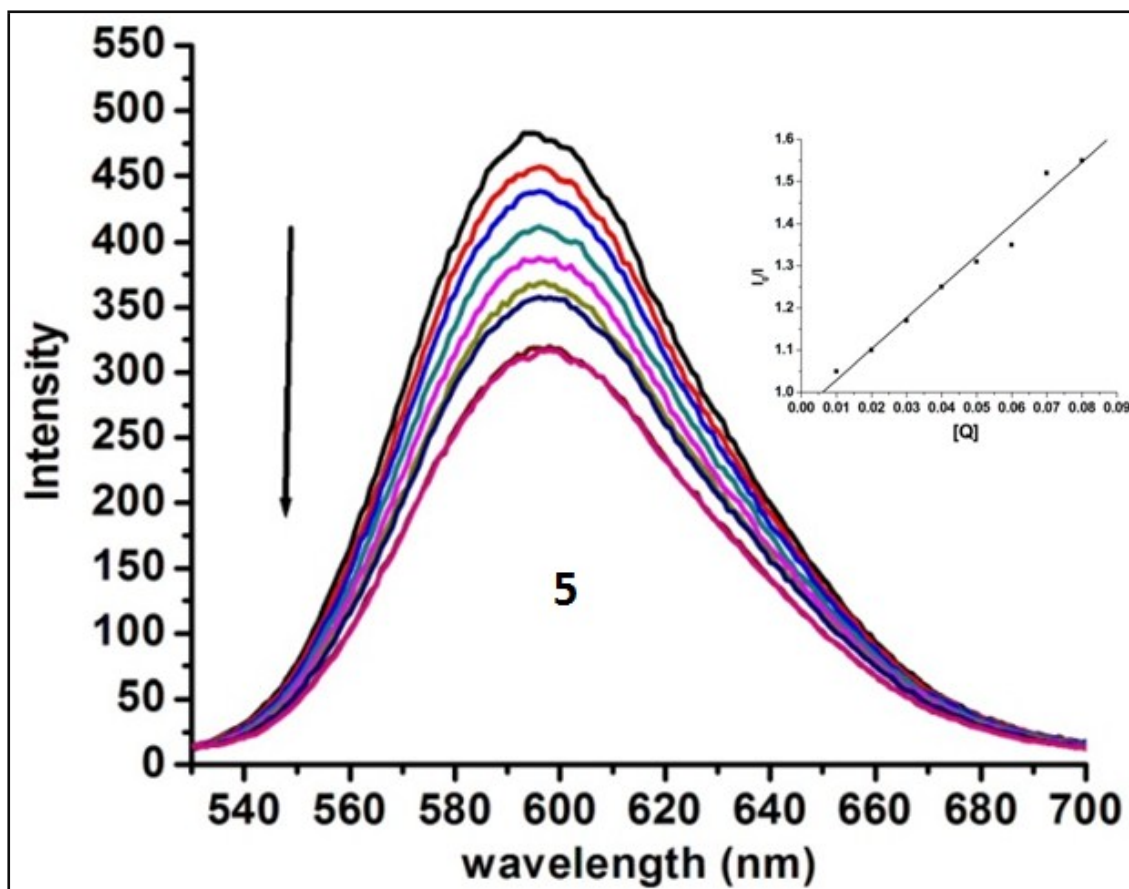

**Fig. S25.** Fluorescence spectra of EB +  $10^{-4}$  M DNA control +  $(1-10) \times 10^{-5}$  M complex **5**. The arrow shows that the intensity decreases with increasing concentration of complex **5**. (Inset: Stern-Volmer plot for the quenching of fluorescence of the ethidium bromide (EB) - DNA complex caused by complex **5**).

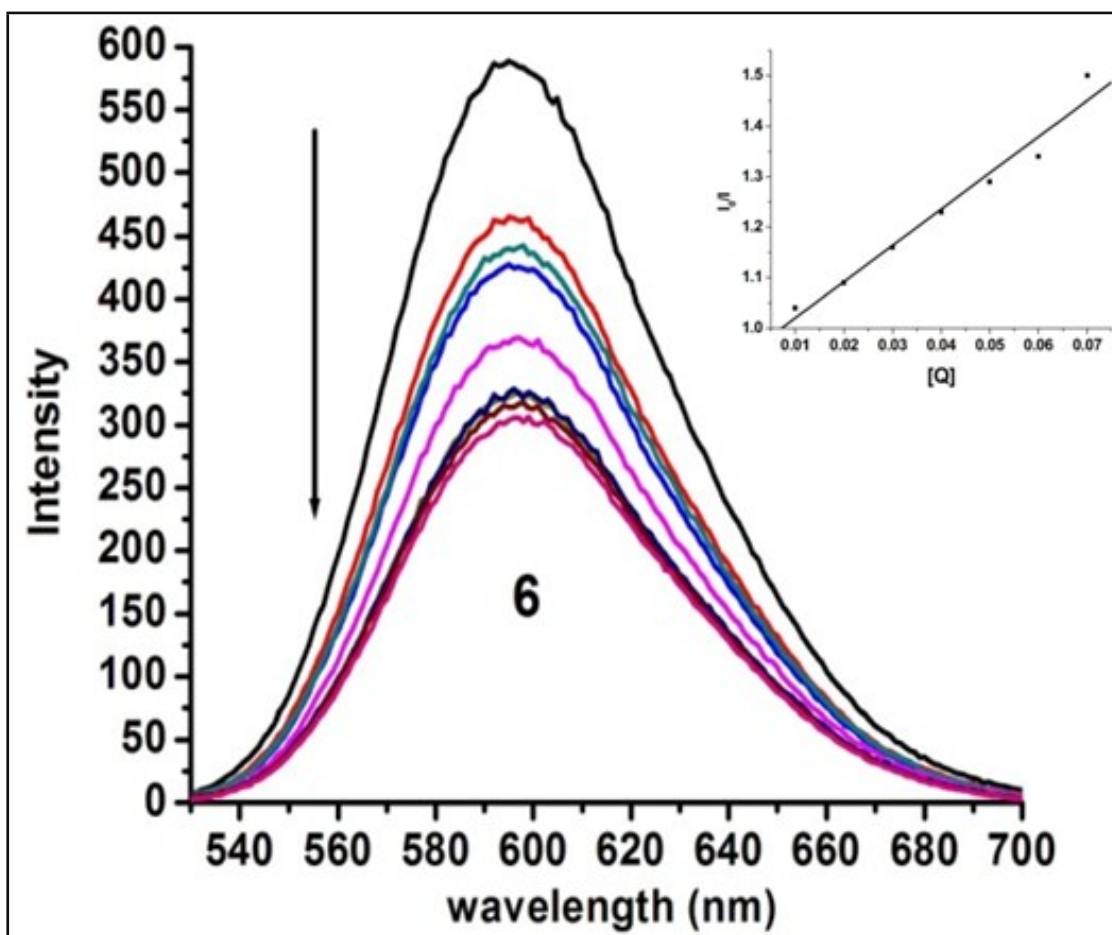

**Fig. S26.** Fluorescence spectra of EB +  $10^{-4}$  M DNA control +  $(1-10) \times 10^{-5}$  M complex 6. The arrow shows that the intensity decreases with increasing concentration of complex 6. (Inset: Stern-Volmer plot for the quenching of fluorescence of the ethidium bromide (EB) - DNA complex caused by complex 6).

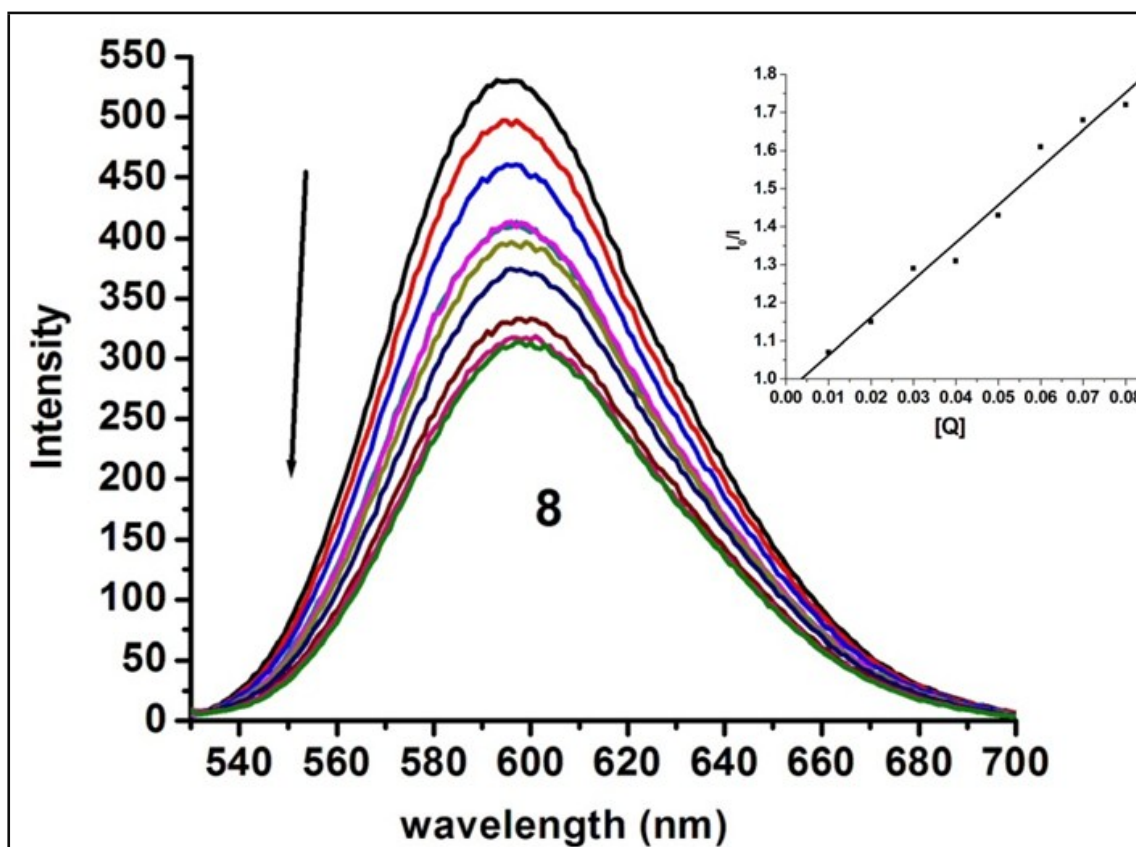

**Fig. S27.** Fluorescence spectra of EB + 10<sup>-4</sup> M DNA control + (1-10) × 10<sup>-5</sup> M complex **8**. The arrow shows that the intensity decreases with increasing concentration of complex **8**. (Inset: Stern-Volmer plot for the quenching of fluorescence of the ethidium bromide (EB) - DNA complex caused by complex **8**).

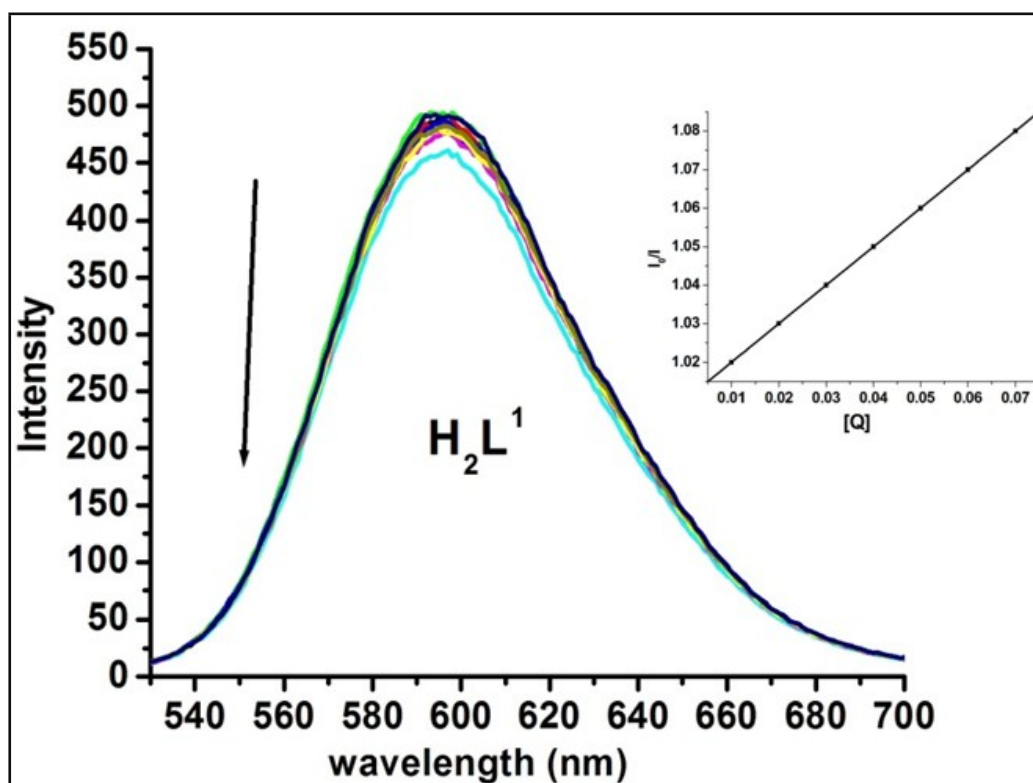

**Fig. S28.** Fluorescence spectra of EB +  $10^{-4}$  M DNA control +  $(1-10) \times 10^{-5}$  M ligand  $H_2L^1$ . The arrow shows that the intensity decreases with increasing concentration of ligand  $H_2L^1$ . (Inset: Stern-Volmer plot for the quenching of fluorescence of the ethidium bromide (EB) -DNA complex caused by ligand  $H_2L^1$ ).

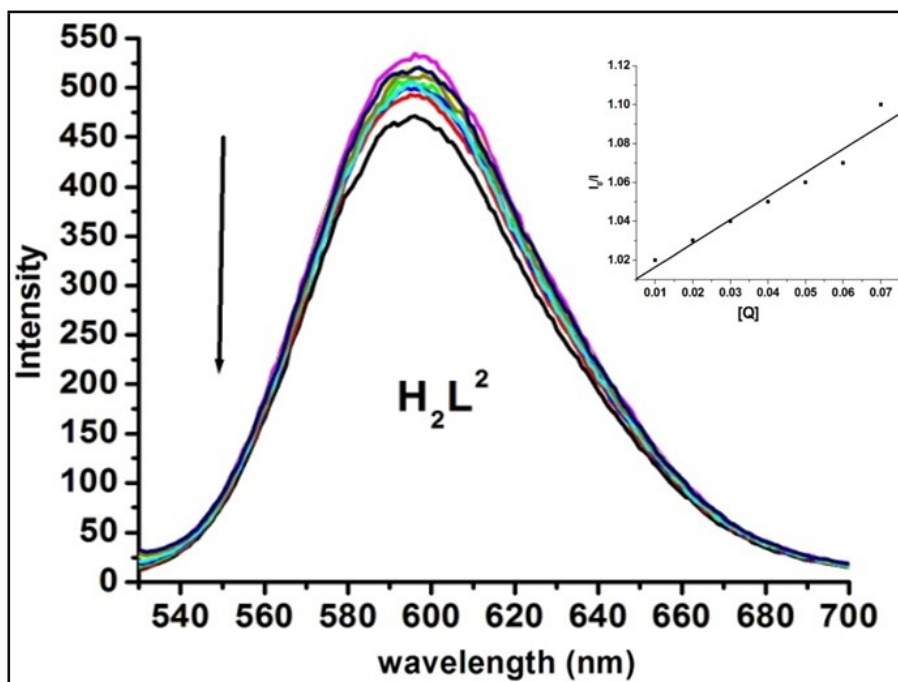

**Fig. S29.** Fluorescence spectra of EB +  $10^{-4}$  M DNA control +  $(1-10) \times 10^{-5}$  M complex  $H_2L^2$ . The arrow shows that the intensity decreases with increasing concentration of ligand  $H_2L^2$  (Inset: Stern-Volmer plot for the quenching of fluorescence of the ethidium bromide (EB) -DNA complex caused by ligand  $H_2L^2$ ).

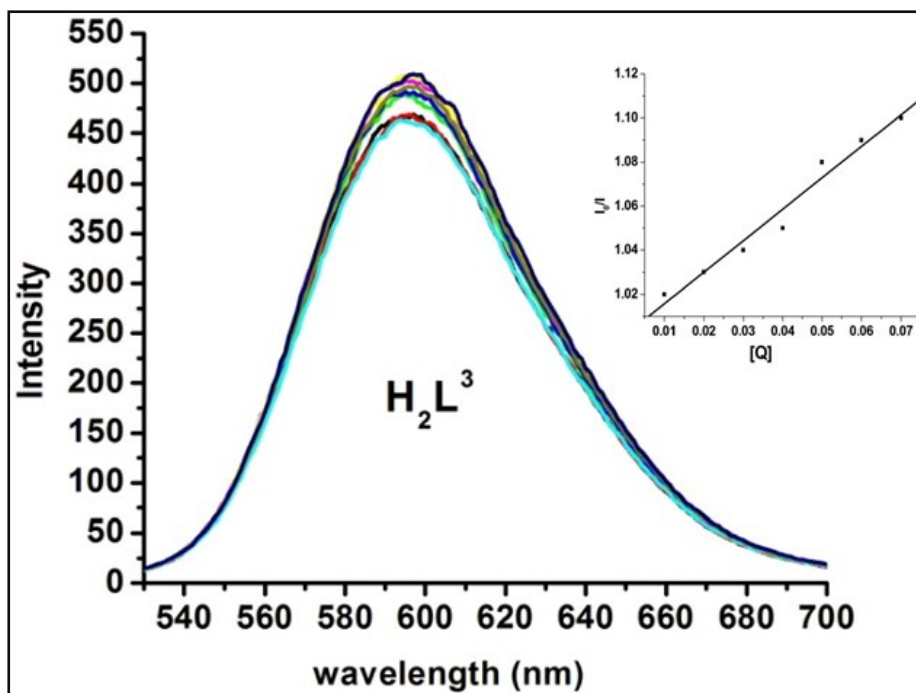

**Fig. S30.** Fluorescence spectra of EB +  $10^{-4}$  M DNA control +  $(1-10) \times 10^{-5}$  M complex  $H_2L^3$ . The arrow shows that the intensity decreases with increasing concentration of ligand  $H_2L^3$  (Inset: Stern-Volmer plot for the quenching of fluorescence of the ethidium bromide (EB) -DNA complex caused by ligand  $H_2L^3$ ).

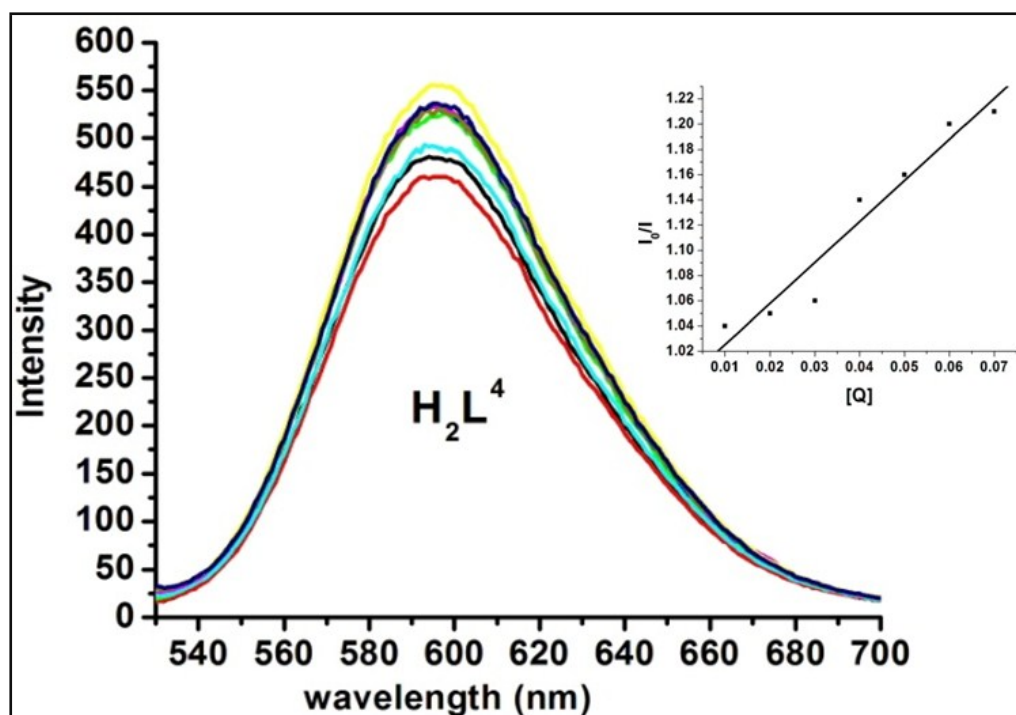

**Fig. S31.** Fluorescence spectra of EB +  $10^{-4}$  M DNA control +  $(1-10) \times 10^{-5}$  M complex  $H_2L^4$ . The arrow shows that the intensity decreases with increasing concentration of ligand  $H_2L^4$  (Inset: Stern-Volmer plot for the quenching of fluorescence of the ethidium bromide (EB) -DNA complex caused by ligand  $H_2L^4$ ).



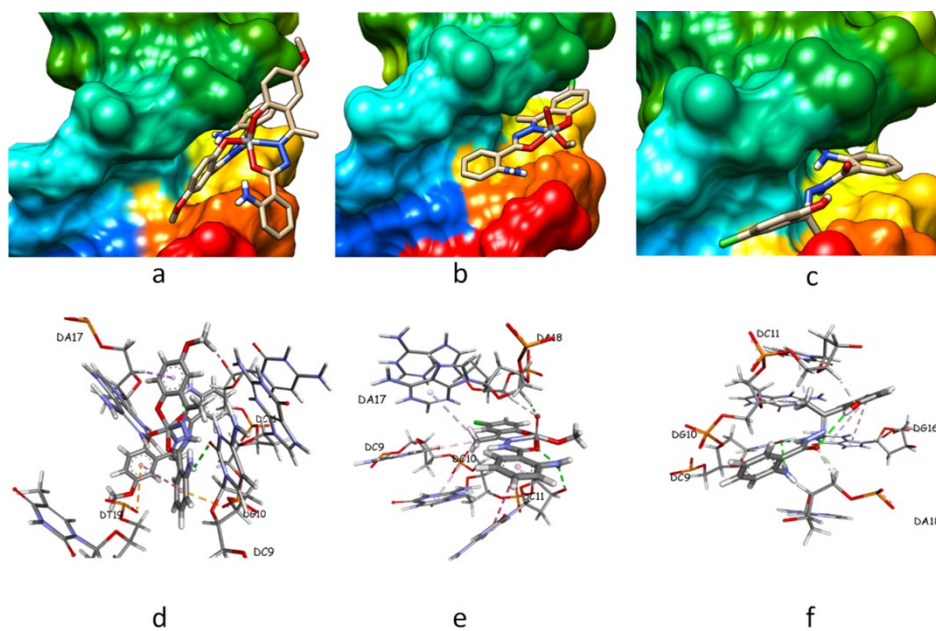

**Fig. S32.** Docked pose of complexes **3** (a), **8** (b) and H<sub>2</sub>L<sup>4</sup> (c) showing interaction with CT DNA base pairs.

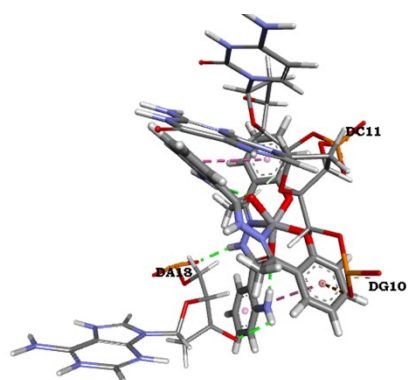

**Fig. S33.** Docked pose of complex **1** showing interaction with CT DNA base pairs.



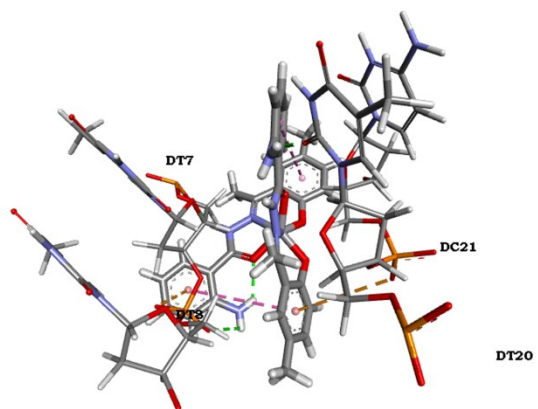

**Fig. S34.** Docked pose of complex 2 showing interaction with CT DNA base pairs.

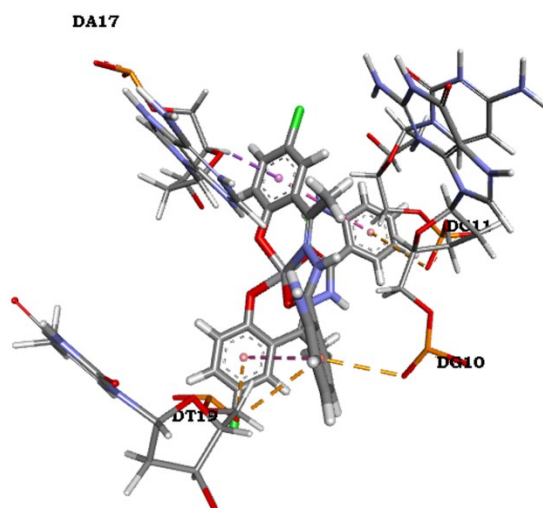

**Fig. S35.** Docked pose of complex 4 showing interaction with CT DNA base pairs.

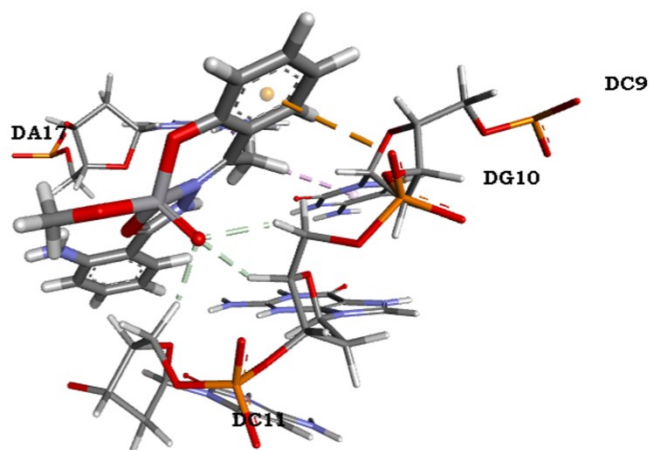

**Fig. S36.** Docked pose of complex 5 showing interaction with CT DNA base pairs.

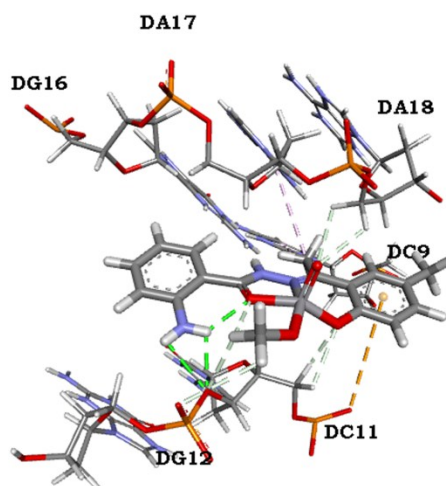

**Fig. S37.** Docked pose of complex 6 showing interaction with CT DNA base pairs.

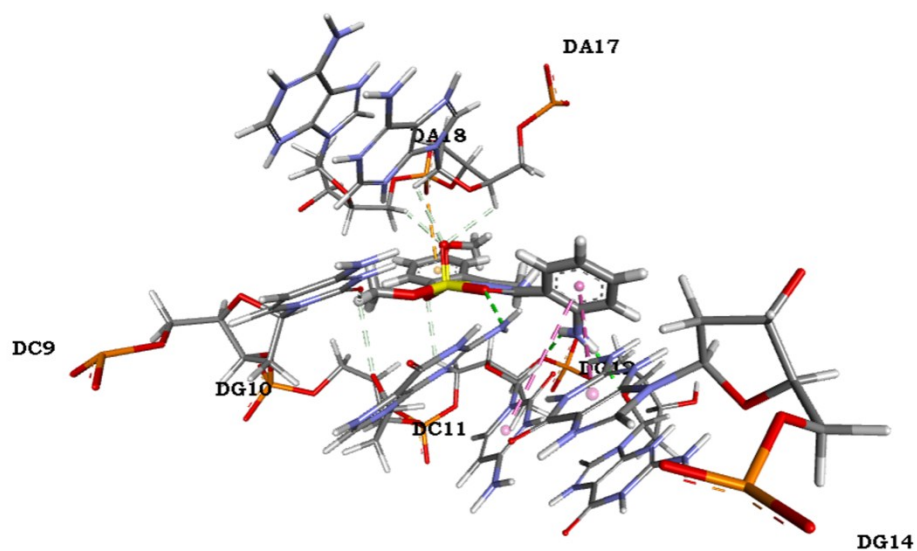

**Fig. S38.** Docked pose of complex 7 showing interaction with CT DNA base pairs.

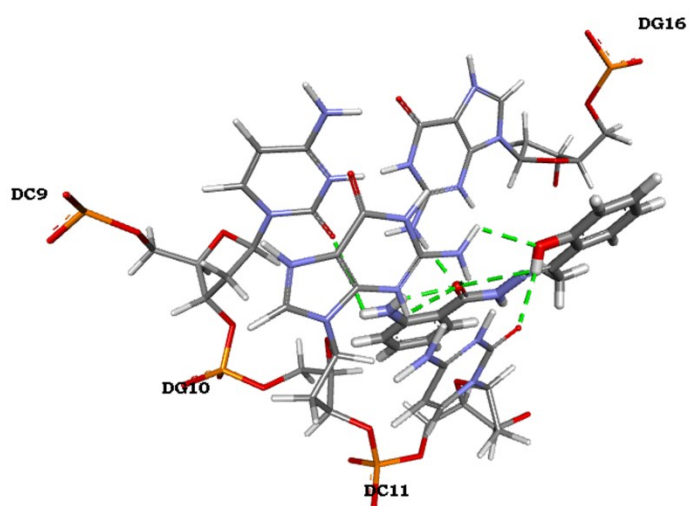

**Fig. S39.** Docked pose of H<sub>2</sub>L<sup>1</sup> ligand showing interaction with CT DNA base pairs.

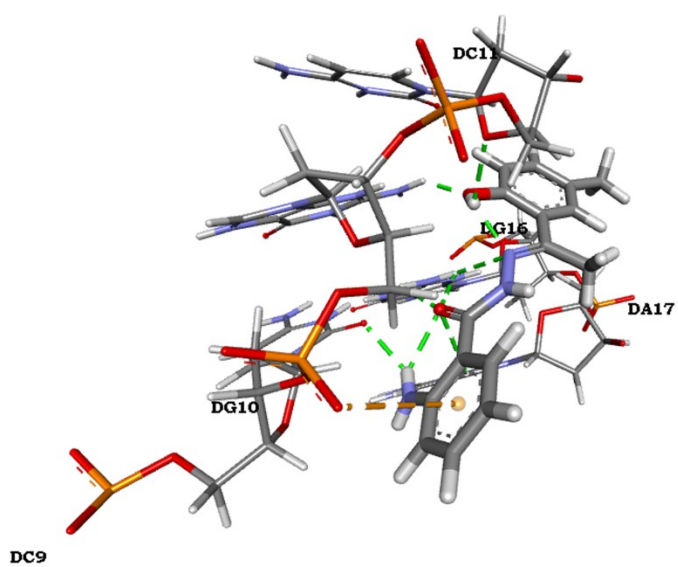

**Fig. S40.** Docked pose of H<sub>2</sub>L<sup>2</sup> ligand showing interaction with CT DNA base pairs.

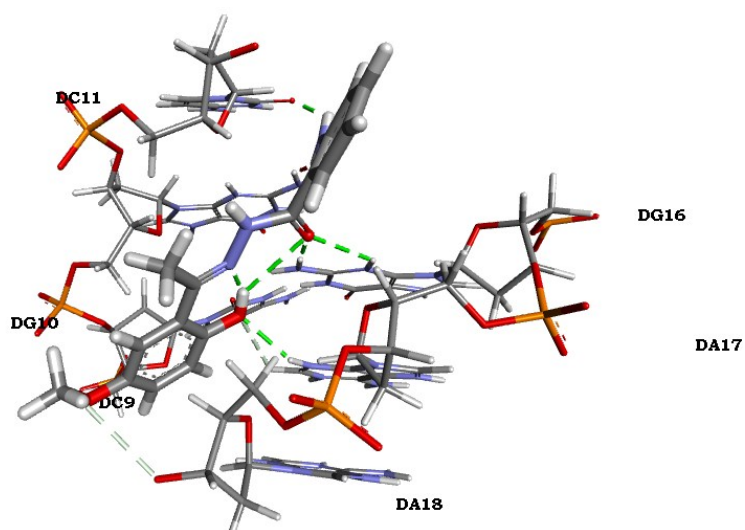

**Fig. S41.** Docked pose of H<sub>2</sub>L<sup>3</sup> ligand showing interaction with CT DNA base pairs.

Table S1 Dimensions of hydrogen bonds [distances, Å, angles (°)] in ligands H<sub>2</sub>L<sup>2</sup> and H<sub>2</sub>L<sup>3</sup>.

| D-H...A                       | d(D-H)  | d(H...A) | d(D...A) | <(DHA) | Symmetry element |
|-------------------------------|---------|----------|----------|--------|------------------|
| H <sub>2</sub> L <sup>2</sup> |         |          |          |        |                  |
| N3-H3B...O1                   | 0.86(2) | 2.25(3)  | 3.035(5) | 152(5) | 1-x, -y, -z      |
| N3-H3A...O2                   | 0.87(2) | 2.08(4)  | 2.687(5) | 126(4) |                  |
| N3-H3A...O2                   | 0.87(2) | 2.36(4)  | 3.065(5) | 139(4) | 1-x, -y, -z      |
| O1-H1...N1                    | 0.87(2) | 1.72(3)  | 2.522(5) | 152(6) |                  |
| H <sub>2</sub> L <sup>3</sup> |         |          |          |        |                  |
| N3-H3B...O1                   | 0.87(2) | 2.30(2)  | 3.091(3) | 155(3) | -x, -y, 1-z      |
| N3-H3B...O2                   | 0.87(2) | 2.13(3)  | 2.748(2) | 128(3) |                  |
| N3-H3B...O2                   | 0.86(2) | 2.45(3)  | 3.127(3) | 134(3) | -x, -y, 1-z      |
| O1-H2...N1                    | 0.86(2) | 1.74(2)  | 2.528(2) | 152(4) |                  |

Table S2. Dimensions obtained via TD DFT of complexes **1-4**.

| Complex          | <b>1</b> | <b>2</b> | <b>3</b> | <b>4</b> |
|------------------|----------|----------|----------|----------|
| Bond lengths, Å  |          |          |          |          |
| V-O1             | 1.888    | 1.887    | 1.885    | 1.889    |
| V-O2             | 1.913    | 1.915    | 1.918    | 1.910    |
| V-N1             | 2.116    | 2.114    | 2.115    | 2.117    |
| Bond angles, deg |          |          |          |          |
| O1-V-O2          | 131.15   | 129.62   | 128.12   | 130.83   |
| O1-V-N1          | 81.86    | 81.90    | 81.94    | 81.84    |
| O2-V-N1          | 73.66    | 73.62    | 73.54    | 73.63    |

Table S3. Dimensions obtained via TD DFT of complexes **5-8**.

| Complex          | <b>5</b> | <b>6</b> | <b>7</b> | <b>8</b> |
|------------------|----------|----------|----------|----------|
| bond lengths, Å  |          |          |          |          |
| V-O1             | 1.843    | 1.842    | 1.833    | 1.844    |
| V-O2             | 1.916    | 1.917    | 1.922    | 1.917    |
| V-O3             | 1.573    | 1.574    | 1.571    | 1.570    |
| V-O4             | 1.771    | 1.772    | 1.775    | 1.772    |
| V-N1             | 2.131    | 2.130    | 2.164    | 2.163    |
| Bond angles, deg |          |          |          |          |
| O3-V-O4          | 107.86   | 107.80   | 107.39   | 107.21   |
| O3-V-O1          | 108.18   | 108.32   | 104.68   | 104.19   |
| O4-V-O1          | 97.87    | 97.94    | 98.69    | 98.45    |
| O3-V-O2          | 110.38   | 110.66   | 103.41   | 103.49   |
| O4-V-O2          | 89.17    | 89.14    | 91.98    | 95.52    |
| O1-V-O2          | 136.35   | 135.92   | 145.24   | 145.54   |
| O3-V-N1          | 97.02    | 96.73    | 100.24   | 100.04   |
| O4-V-N1          | 153.75   | 154.07   | 151.22   | 151.76   |
| O1-V-N1          | 81.70    | 81.71    | 81.39    | 81.39    |
| O2-V-N1          | 74.12    | 74.12    | 73.82    | 73.90    |
